# Supplementary material for: Multi-functional d10 metal–organic materials based on bis-pyrazole/pyridine ligands supported by a 2,6-di(3-pyrazolyl)pyridine with different spanning flexible dicarboxylate ligands: synthesis, structure, photoluminescent and catalytic properties
Source: Royal Society of Chemistry journal article supplement (doi:10.1039/c3ce41213j), 2013-01-01
Supplement: c3ce41213j.pdf [file c3ce41213j.pdf]

**Multi-functional d<sup>10</sup> metal-organic materials based on  
bis-pyrazole/pyridine ligands-supported by 2,6-di(3-pyrazolyl)pyridine  
with different spanning flexible dicarboxylate ligands: Synthesis,  
structure, photoluminescent and catalytic properties**

Xiaoxi Zhang<sup>1</sup>, Na Xing<sup>1</sup>, Fengying Bai<sup>\*2</sup>, Lijuan Wan<sup>1</sup>, Hui Shan<sup>1</sup>, Yanan Hou<sup>1</sup>, Yongheng Xing<sup>\*1</sup>,  
Zhan Shi<sup>3</sup>

<sup>1</sup> *College of Chemistry and Chemical Engineering, Liaoning Normal University, Dalian City, 11602*

<sup>2</sup> *College of Life Science, Liaoning Normal University, Dalian City, 11602*

<sup>3</sup> *State Key Laboratory of Inorganic Synthesis and Preparative Chemistry, College of Chemistry, Jilin University, Changchun 130012, P.R. China*

\*e-mail: [xingyongheng2000@163.com](mailto:xingyongheng2000@163.com) tel: 0411-82156987

Table S1. Selected bond lengths (Å) and angles (°) of the complexes **1-6**

Table S2. Bond distances (Å) and angles (°) of hydrogen bonds in the complexes **1-6**

Fig S1. The Solid-state IR spectra of complex **1** at a room temperature

Fig S2. The Solid-state IR spectra of complex **2** at a room temperature

Fig S3. The Solid-state IR spectra of complex **3** at a room temperature

Fig S4. The Solid-state IR spectra of complex **4** at a room temperature

Fig S5. The Solid-state IR spectra of complex **5** at a room temperature

Fig S6. The Solid-state IR spectra of complex **6** at a room temperature

Fig S7. PXRD powder patterns: a experimental PXRD for complex **1**, b the simulated PXRD pattern calculated from single-crystal structure of complex **1**.

Fig S8. PXRD powder patterns: a experimental PXRD for complex **2**, b the simulated PXRD pattern calculated from single-crystal structure of complex **2**.

Fig S9. PXRD powder patterns: a experimental PXRD for complex **3**, b the simulated PXRD pattern calculated from single-crystal structure of complex **3**.

Fig S10. PXRD powder patterns: a experimental PXRD for complex **4**, b the simulated PXRD pattern calculated from single-crystal structure of complex **4**.

Fig S11. PXRD powder patterns: a experimental PXRD for complex **5**, b the simulated PXRD pattern calculated from single-crystal structure of complex **5**.

Fig S12. PXRD powder patterns: a experimental PXRD for complex **6**, b the simulated PXRD pattern calculated from single-crystal structure of complex **6**.

Fig S13. The Solid-state UV–Vis spectra of  $H_2L^1$  and complex **1, 2** at a room temperature

Fig S14. The Solid-state UV–Vis spectra of  $H_2L^2$  and complex **3-6** at a room temperature

Fig S15. A view of the hydrogen bonds of complex **1** (a part of hydrogen atoms are omitted for clarity)

Fig S16. A view of the hydrogen bonds of complex **2** (a part of hydrogen atoms are omitted for clarity)

Fig S17. A view of the hydrogen bonds of complex **3** (a part of hydrogen atoms are omitted for clarity)

Fig S18. A view of the hydrogen bonds of complex **5** (a part of hydrogen atoms are omitted for clarity)

Table S1. Selected bond lengths (Å) and angles (°) of the complexes **1-6**

|                         |            |                                      |            |                                       |            |
|-------------------------|------------|--------------------------------------|------------|---------------------------------------|------------|
| <b>Complex 1</b>        |            |                                      |            |                                       |            |
| Zn1-O3                  | 2.058(4)   | Zn1-N4                               | 2.239(5)   | Zn2-O4                                | 2.059(4)   |
| Zn1-O1                  | 2.081(4)   | Zn1-N2                               | 2.194(5)   | Zn2-O4 <sup>#</sup>                   | 2.059(4)   |
| Zn1-O2                  | 2.130(4)   | Zn2-O5                               | 2.103(4)   | Zn2-O5 <sup>#</sup>                   | 2.103(4)   |
| Zn1-N3                  | 2.096(4)   | Zn2-O7                               | 2.159(4)   | Zn2-O7 <sup>#</sup>                   | 2.159(4)   |
| O3-Zn1-O1               | 90.08(17)  | O2-Zn1-N2                            | 94.16(17)  | O4-Zn2-O5                             | 96.68(16)  |
| O3-Zn1-O2               | 78.53(15)  | O3-Zn1-N4                            | 103.97(18) | O4 <sup>#</sup> -Zn2-O5               | 95.95(16)  |
| O1-Zn1-O2               | 168.61(15) | N3-Zn1-N4                            | 74.59(18)  | O5 <sup>#</sup> -Zn2-O5               | 79.3(2)    |
| O3-Zn1-N3               | 167.49(17) | N3-Zn1-N2                            | 75.36(18)  | O4-Zn2-O7                             | 90.56(15)  |
| O1-Zn1-N3               | 102.34(17) | N2-Zn1-N4                            | 149.29(17) | O4 <sup>#</sup> -Zn2-O7               | 79.12(15)  |
| N3-Zn1-O2               | 89.04(15)  | O5 <sup>#</sup> 1-Zn2-O7             | 89.40(17)  | O4-Zn2-O5 <sup>#</sup>                | 95.95(16)  |
| O3-Zn1-N2               | 106.74(18) | O5-Zn2-O7                            | 167.17(17) | O4 <sup>#</sup> -Zn2-O5 <sup>#</sup>  | 96.68(16)  |
| O1-Zn1-N2               | 89.13(18)  | O4-Zn2-O4 <sup>#</sup>               | 163.6(2)   | O5 <sup>#</sup> -Zn2-O7 <sup>#</sup>  | 167.16(17) |
| O1-Zn1-N4               | 91.17(17)  | O4-Zn2-O7 <sup>#</sup>               | 79.12(15)  | O5-Zn2-O7 <sup>#</sup>                | 89.40(17)  |
| O2-Zn1-N4               | 91.54(16)  | O4 <sup>#</sup> -Zn2-O7 <sup>#</sup> | 90.56(15)  | O7-Zn2-O7 <sup>#</sup>                | 102.4(2)   |
| <b>Complex 2</b>        |            |                                      |            |                                       |            |
| Zn-O1                   | 1.936(3)   | Zn-N3                                | 2.113(5)   | Zn-N2 <sup>#1</sup>                   | 2.234(3)   |
| Zn-O1 <sup>#1</sup>     | 1.936(3)   | Zn-N2                                | 2.234(3)   | O1-Zn-O1 <sup>#1</sup>                | 134.3(2)   |
| O1-Zn-N3                | 112.85(10) | O1 <sup>#1</sup> -Zn-N2              | 102.88(12) | O1 <sup>#1</sup> -Zn-N2 <sup>#1</sup> | 89.43(12)  |
| O1 <sup>#1</sup> -Zn-N3 | 112.85(10) | N3-Zn-N2                             | 74.09(9)   | N3-Zn-N2 <sup>#1</sup>                | 74.09(9)   |
| O1-Zn-N2                | 89.43(12)  | O1-Zn-N2 <sup>#1</sup>               | 102.88(12) | N2-Zn-N2 <sup>#1</sup>                | 148.17(19) |
| <b>Complex 3</b>        |            |                                      |            |                                       |            |
| Zn1-O2                  | 2.001(2)   | Zn1-N2                               | 2.221(3)   | Zn2-N8                                | 2.104(3)   |
| Zn1-N10                 | 2.001(3)   | Zn2-O1                               | 1.987(3)   | Zn2-N9                                | 2.136(3)   |
| Zn1-N3                  | 2.113(3)   | Zn2-N5                               | 2.013(3)   | Zn2-N7                                | 2.255(3)   |
| Zn1-N4                  | 2.142(3)   | O2-Zn1-N10                           | 107.54(11) | O2-Zn1-N3                             | 124.23(11) |
| N10-Zn1-N3              | 128.14(12) | N3-Zn1-N2                            | 74.04(10)  | N5-Zn2-N9                             | 97.23(11)  |
| O2-Zn1-N4               | 96.86(11)  | N4-Zn1-N2                            | 148.67(10) | N8-Zn2-N9                             | 75.15(11)  |
| N10-Zn1-N4              | 97.66(12)  | O1-Zn2-N5                            | 106.25(11) | O1-Zn2-N7                             | 94.72(11)  |
| N3-Zn1-N4               | 75.05(11)  | O1-Zn2-N8                            | 119.77(11) | N5-Zn2-N7                             | 107.27(11) |
| O2-Zn1-N2               | 96.24(11)  | N5-Zn2-N8                            | 133.84(12) | N8-Zn2-N7                             | 73.97(11)  |
| N10-Zn1-N2              | 105.28(11) | O1-Zn2-N9                            | 96.67(11)  | N9-Zn2-N7                             | 148.80(11) |
| <b>Complex 4</b>        |            |                                      |            |                                       |            |
| Zn1-O2                  | 1.966(2)   | Zn1-N9                               | 2.305(3)   | Zn2-N3                                | 2.114(3)   |

---

|                  |            |            |            |            |            |
|------------------|------------|------------|------------|------------|------------|
| Zn1-N1           | 2.005(3)   | Zn2-O4     | 1.970(2)   | Zn2-N2     | 2.191(3)   |
| Zn1-N8           | 2.123(3)   | Zn2-N6     | 2.003(3)   | Zn2-N4     | 2.238(3)   |
| Zn1-N7           | 2.172(3)   | O2-Zn1-N1  | 118.99(10) | O2-Zn1-N8  | 111.43(10) |
| N1-Zn1-N8        | 129.26(10) | N8-Zn1-N9  | 73.09(10)  | N6-Zn2-N2  | 90.56(10)  |
| O2-Zn1-N7        | 99.18(10)  | N7-Zn1-N9  | 147.60(10) | N3-Zn2-N2  | 75.14(10)  |
| N1-Zn1-N7        | 91.69(10)  | O4-Zn2-N6  | 116.93(11) | O4-Zn2-N4  | 94.40(10)  |
| N8-Zn1-N7        | 74.66(10)  | O4-Zn2-N3  | 116.72(10) | N6-Zn2-N4  | 107.13(11) |
| O2-Zn1-N9        | 95.33(10)  | N6-Zn2-N3  | 126.10(11) | N3-Zn2-N4  | 73.45(10)  |
| N1-Zn1-N9        | 106.30(10) | O4-Zn2-N2  | 100.49(10) | N2-Zn2-N4  | 148.58(10) |
| <b>Complex 5</b> |            |            |            |            |            |
| Zn1-O1           | 1.994(6)   | Zn1-N9     | 2.234(7)   | Zn2-N3     | 2.120(7)   |
| Zn1-N1           | 2.005(7)   | Zn2-N6     | 1.997(8)   | Zn2-N2     | 2.125(7)   |
| Zn1-N8           | 2.099(7)   | Zn2-O2     | 2.009(6)   | Zn2-N4     | 2.157(7)   |
| Zn1-N7           | 2.149(7)   | O1-Zn1-N1  | 107.6(3)   | O1-Zn1-N8  | 122.6(3)   |
| N1-Zn1-N8        | 129.8(3)   | N8-Zn1-N9  | 74.6(3)    | O2-Zn2-N2  | 96.6(3)    |
| O1-Zn1-N7        | 99.7(3)    | N7-Zn1-N9  | 149.8(3)   | N3-Zn2-N2  | 74.6(3)    |
| N1-Zn1-N7        | 96.1(3)    | N6-Zn2-O2  | 105.9(3)   | N6-Zn2-N4  | 106.0(3)   |
| N8-Zn1-N7        | 75.3(3)    | N6-Zn2-N3  | 132.5(3)   | O2-Zn2-N4  | 95.4(3)    |
| O1-Zn1-N9        | 94.2(3)    | O2-Zn2-N3  | 121.5(3)   | N3-Zn2-N4  | 74.7(3)    |
| N1-Zn1-N9        | 105.1(3)   | N6-Zn2-N2  | 98.0(3)    | N2-Zn2-N4  | 149.0(3)   |
| <b>Complex 6</b> |            |            |            |            |            |
| Zn1-N10          | 1.989(2)   | Zn1-N4     | 2.189(3)   | Zn2-N8     | 2.082(2)   |
| Zn1-O1           | 2.000(2)   | Zn2-O2     | 2.008(2)   | Zn2-N9     | 2.158(3)   |
| Zn1-N3           | 2.096(2)   | Zn2-N5     | 2.017(2)   | Zn2-N7     | 2.171(3)   |
| Zn1-N2           | 2.187(3)   | N10-Zn1-O1 | 109.02(10) | N10-Zn1-N3 | 131.39(11) |
| O1-Zn1-N3        | 118.91(9)  | N3-Zn1-N4  | 75.25(10)  | N5-Zn2-N9  | 92.98(10)  |
| N10-Zn1-N2       | 111.25(10) | N2-Zn1-N4  | 148.99(9)  | N8-Zn2-N9  | 75.98(10)  |
| O1-Zn1-N2        | 93.46(10)  | O2-Zn2-N5  | 109.65(10) | O2-Zn2-N7  | 100.88(10) |
| N3-Zn1-N2        | 74.79(10)  | O2-Zn2-N8  | 120.91(10) | N5-Zn2-N7  | 105.13(10) |
| N10-Zn1-N4       | 94.55(10)  | N5-Zn2-N8  | 128.54(11) | N8-Zn2-N7  | 75.46(10)  |
| O1-Zn1-N4        | 94.04(10)  | O2-Zn2-N9  | 93.37(10)  | N9-Zn2-N7  | 151.40(9)  |

---

Table S2. Bond distances (Å) and angles (°) of hydrogen bonds in the complexes **1-6**

| <i>D—H...A</i>   | <i>d(D-H)</i> | <i>D(H...A)</i> | <i>dD((D...A)</i> | <i>∠DHA</i> |
|------------------|---------------|-----------------|-------------------|-------------|
| <b>Complex 1</b> |               |                 |                   |             |
| N1—H1D...O7      | 0.8600        | 2.0375          | 2.8457            | 156.22      |
| O1—H1E...O5      | 0.8501        | 2.2012          | 2.9262            | 143.16      |
| O1—H1F...O1W     | 0.8500        | 2.0341          | 2.6709            | 131.11      |
| O2W—H2WA...O5    | 0.9599        | 1.8789          | 2.7896            | 157.43      |
| O2W—H2WB...O1W   | 0.9601        | 1.8902          | 2.6584            | 135.14      |
| N5—H5A...O6      | 0.8600        | 2.0310          | 2.8794            | 168.77      |
| C7—H7... O2W     | 0.9300        | 2.3837          | 3.2712            | 159.55      |
| C8—H8...O2       | 0.9300        | 2.4098          | 3.2791            | 155.56      |
| <b>Complex 2</b> |               |                 |                   |             |
| N1—H1D...O1W     | 0.8600        | 1.9600          | 2.7918            | 162.37      |
| O1W—H1WB...O2    | 0.8499        | 1.9638          | 2.7384            | 151.01      |
| <b>Complex 3</b> |               |                 |                   |             |
| N1—H1A...O3      | 0.8600        | 1.7973          | 2.6056            | 155.79      |
| N6—H6A...O1W     | 0.8600        | 1.9285          | 2.7802            | 170.40      |
| <b>Complex 4</b> |               |                 |                   |             |
| O2W— H2WA...O1   | 0.8499        | 1.9482          | 2.6211            | 135.27      |
| N5— H5A ...O1W   | 0.8600        | 2.2690          | 3.1227            | 171.80      |
| N10— H10A...O2W  | 0.8600        | 2.0088          | 2.8384            | 161.76      |
| C12—H12A...O1    | 0.9300        | 2.5267          | 3.3290            | 144.65      |
| C39—H39A...O2    | 0.9300        | 2.5523          | 3.3286            | 141.21      |
| <b>Complex 5</b> |               |                 |                   |             |
| N5—H5A...O1W     | 0.8600        | 1.9919          | 2.8191            | 161.02      |
| N10—H10A...O2W   | 0.8600        | 1.9445          | 2.7812            | 163.95      |
| <b>Complex 6</b> |               |                 |                   |             |
| O1—H1C...O5      | 0.8457        | 1.7803          | 2.6208            | 172.30      |
| O1—H1D...O2      | 0.8550        | 1.8286          | 2.6772            | 171.50      |
| O2W—H2WA...O2    | 0.9267        | 1.8495          | 2.7610            | 167.30      |
| O3W—H3WA...O5    | 0.8480        | 1.8381          | 2.6466            | 158.83      |
| O1W—H1WB...O2W   | 0.8596        | 1.8920          | 2.6055            | 139.42      |
| O2W—H2WB...O3W   | 0.8559        | 2.0121          | 2.8157            | 156.02      |
| O3W—H3WB...O1W   | 0.8398        | 2.0822          | 2.8297            | 148.02      |
| N1—H1B...O4      | 0.8600        | 1.8768          | 2.7146            | 164.28      |

|               |        |        |        |        |
|---------------|--------|--------|--------|--------|
| N6—H6A---O3W  | 0.8600 | 1.9154 | 2.7499 | 163.17 |
| C5—H5A---O4   | 0.9300 | 2.4161 | 3.3118 | 161.66 |
| C34—H34A---O3 | 0.9300 | 2.4042 | 3.3118 | 165.14 |

---

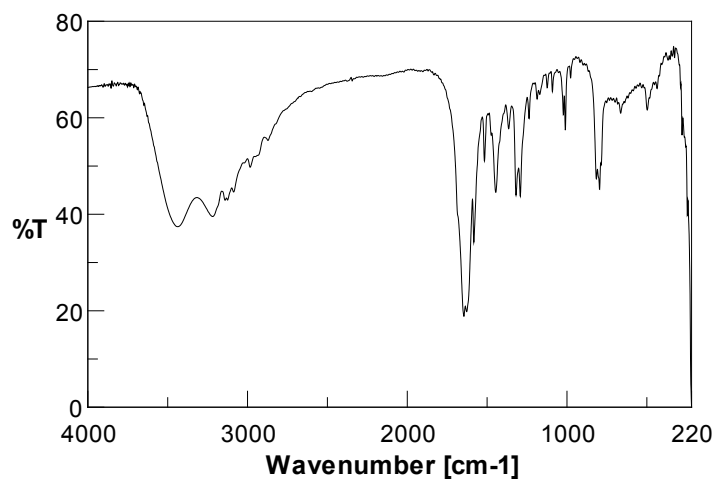

Fig S1. The Solid-state IR spectra of complex **1** at a room temperature

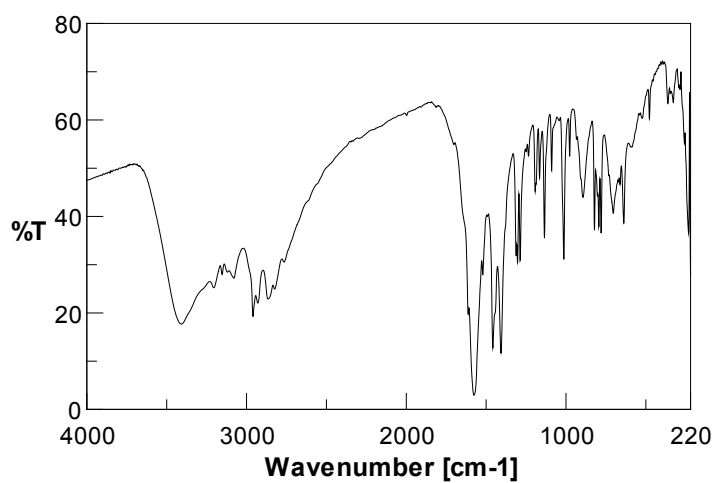

Fig S2. The Solid-state IR spectra of complex **2** at a room temperature

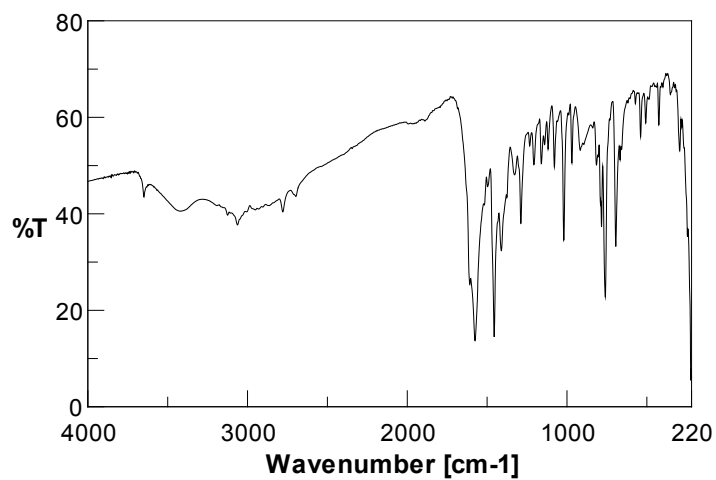

Fig S3. The Solid-state IR spectra of complex **3** at a room temperature

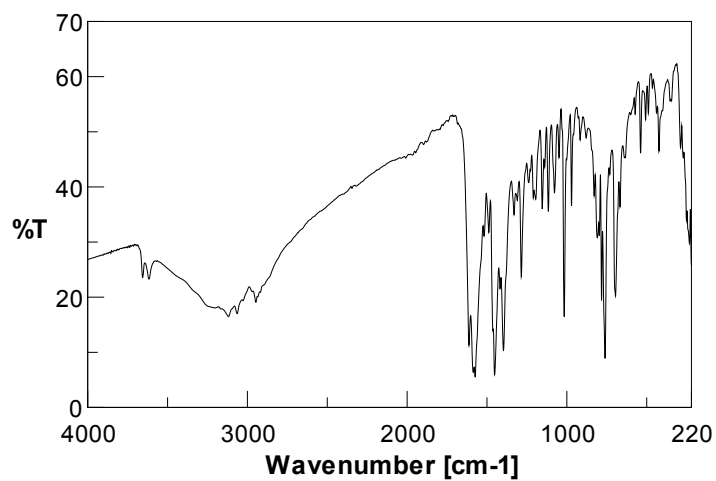

Fig S4. The Solid-state IR spectra of complex **4** at a room temperature

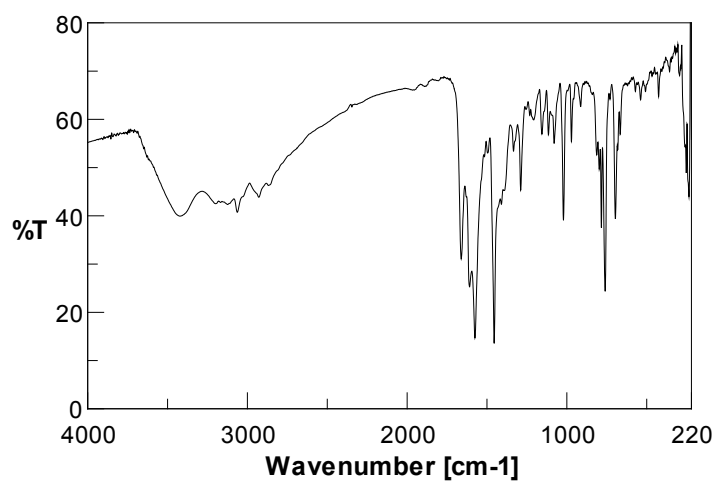

Fig S5. The Solid-state IR spectra of complex **5** at a room temperature

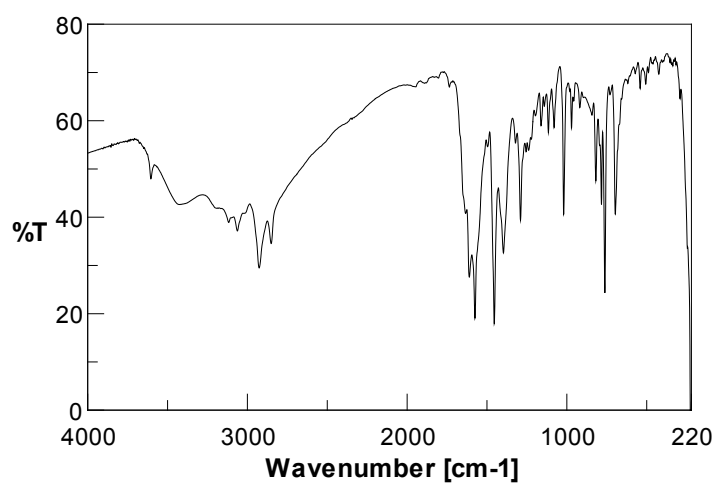

Fig S6. The Solid-state IR spectra of complex **6** at a room temperature



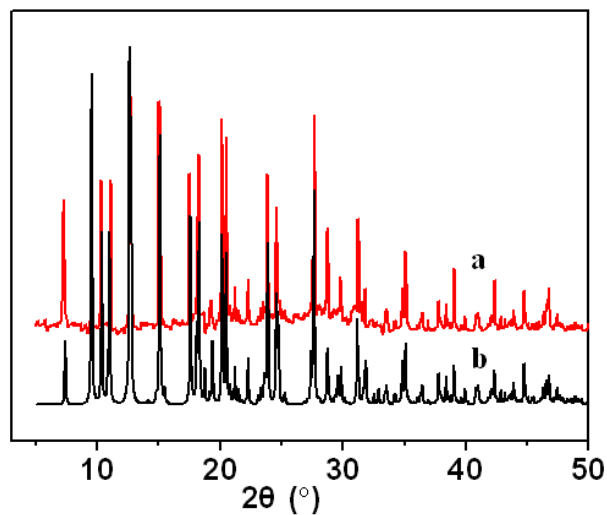

Fig S7. PXRD powder patterns: a experimental PXRD for complex 1, b the simulated PXRD pattern calculated from single-crystal structure of complex 1.

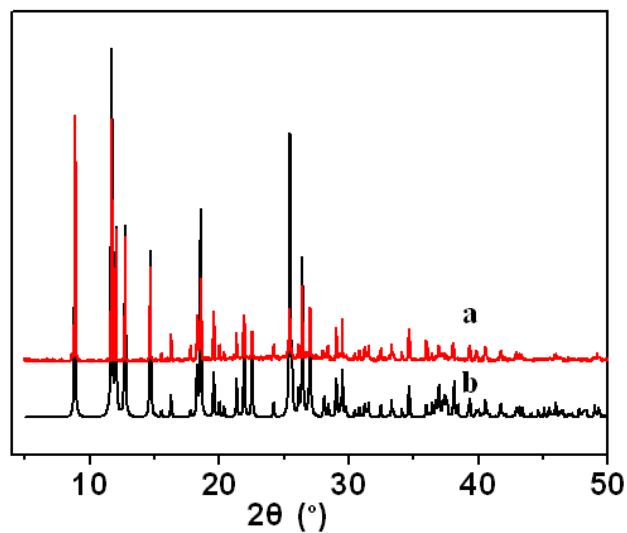

Fig S8. PXRD powder patterns: a experimental PXRD for complex 2, b the simulated PXRD pattern calculated from single-crystal structure of complex 2.

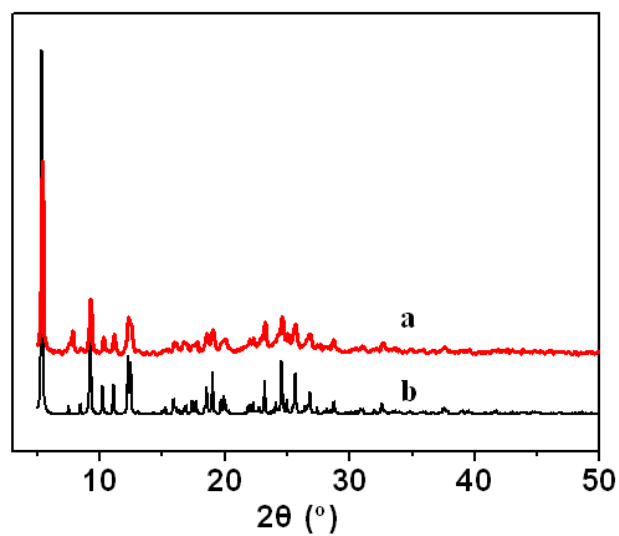

Fig S9. PXRD powder patterns: a experimental PXRD for complex 3, b the simulated PXRD pattern calculated from single-crystal structure of complex 3.

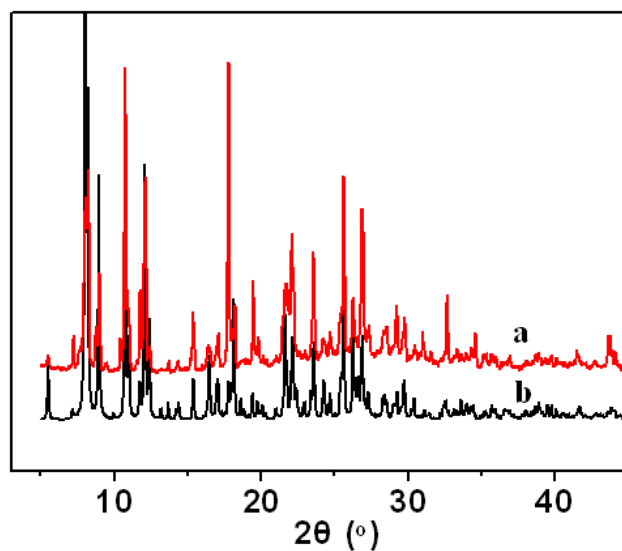

Fig S10. PXRD powder patterns: a experimental PXRD for complex 4, b the simulated PXRD pattern calculated from single-crystal structure of complex 4.

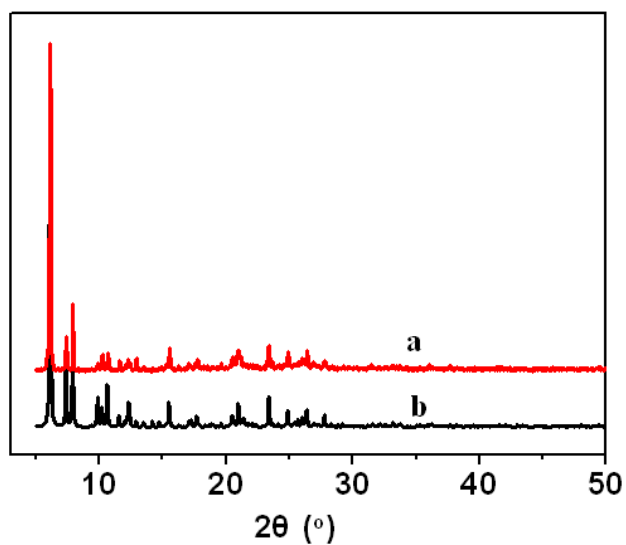

Fig S11. PXRD powder patterns: a experimental PXRD for complex 5, b the simulated PXRD pattern calculated from single-crystal structure of complex 5.

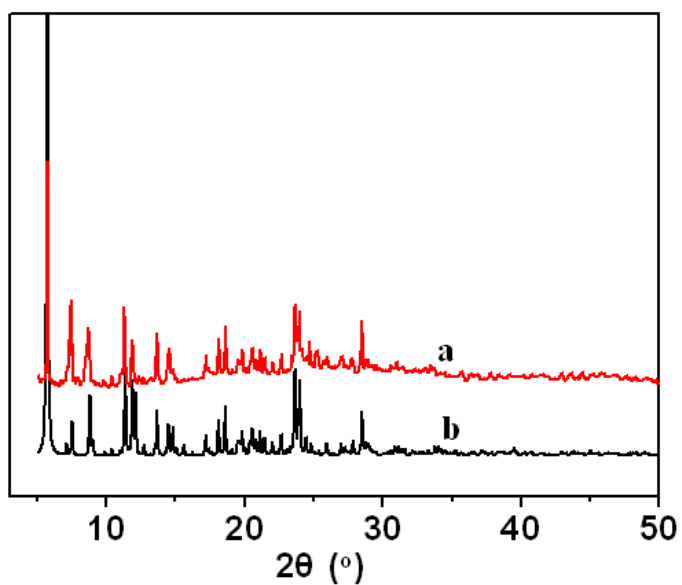

Fig S12. PXRD powder patterns: a experimental PXRD for complex 6, b the simulated PXRD pattern calculated from single-crystal structure of complex 6.

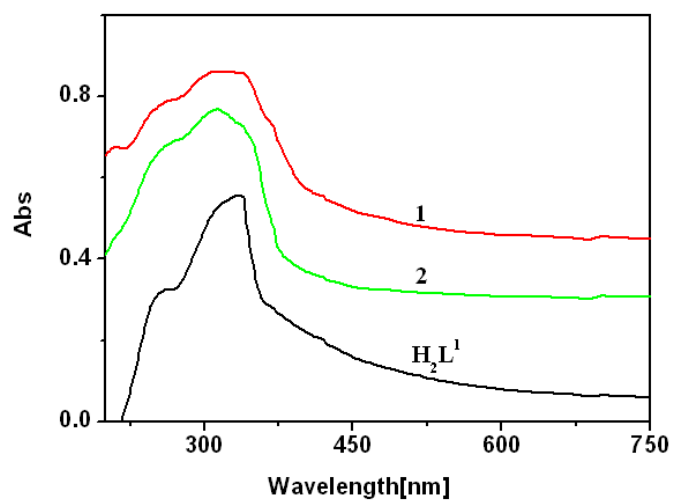

Fig S13. The Solid-state UV-Vis spectra of  $H_2L^1$  and complex 1, 2 at a room temperature

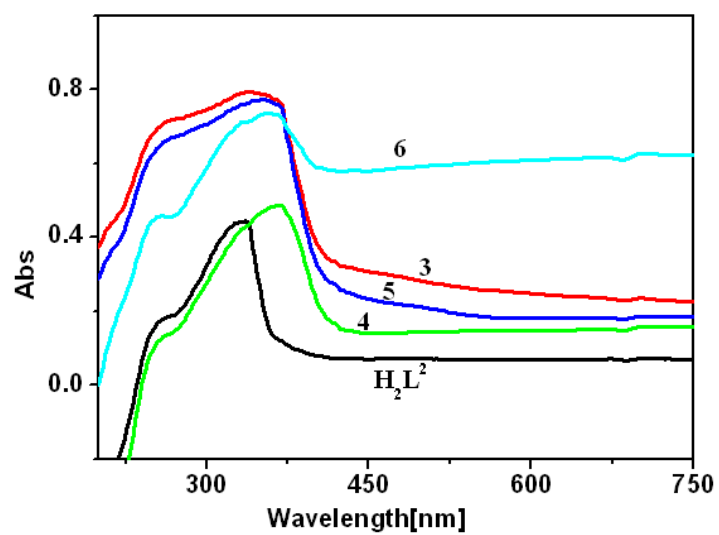

Fig S14. The Solid-state UV-Vis spectra of  $H_2L^2$  and complex 3-6 at a room temperature

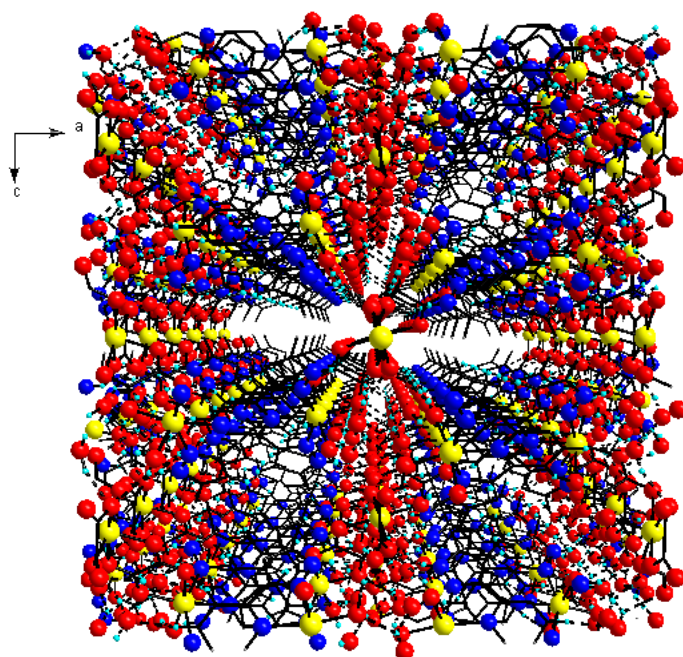

Fig S15. A view of the hydrogen bonds of complex 1 (a part of hydrogen atoms are omitted for clarity)

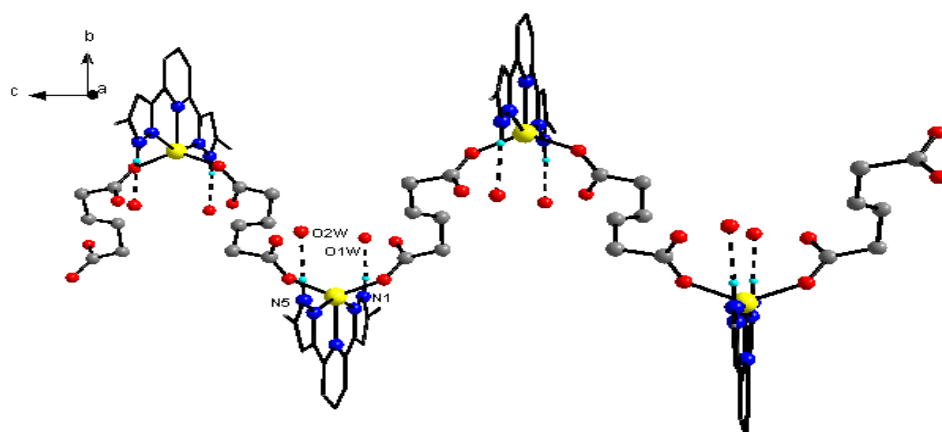

Fig S16. A view of the hydrogen bonds of complex 2 (a part of hydrogen atoms are omitted for clarity)

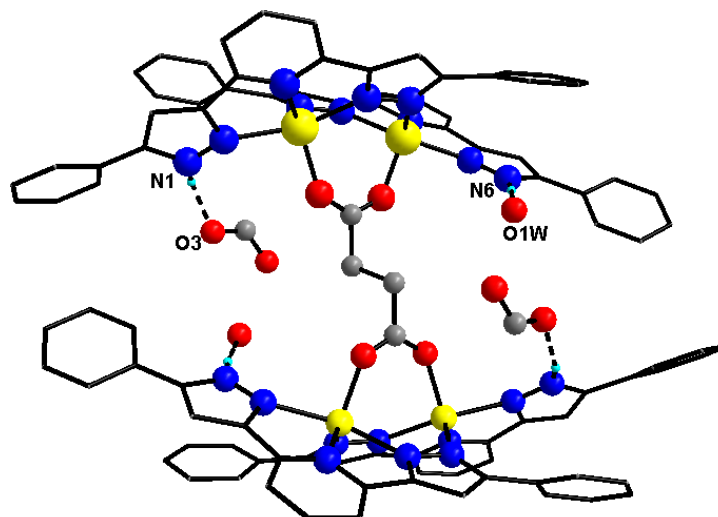

Fig S17. A view of the hydrogen bonds of complex **3** (a part of hydrogen atoms are omitted for clarity)

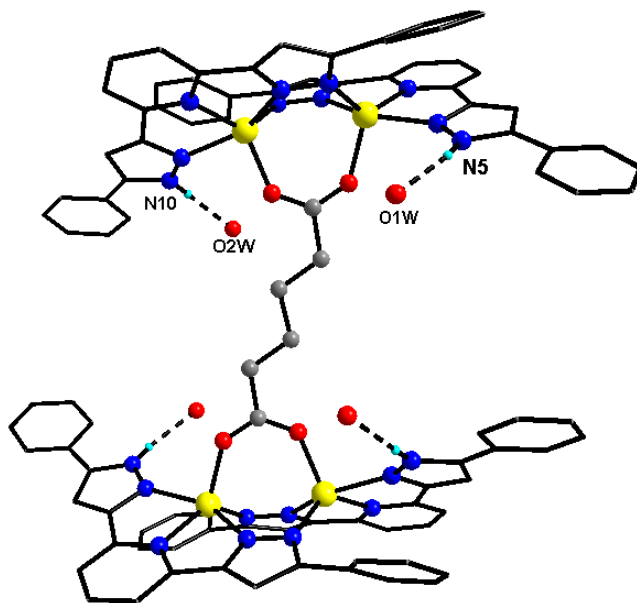

Fig S18. A view of the hydrogen bonds of complex **5** (a part of hydrogen atoms are omitted for clarity)
